# Supplementary material for: High and stable photoelectrochemical activity of ZnO/ZnSe/CdSe/CuxS core–shell nanowire arrays: nanoporous surface with CuxS as a hole mediator
Source: Royal Society of Chemistry journal article supplement (doi:10.1039/c5cp01421b), 2015-01-01
Supplement: c5cp01421b1.pdf [file c5cp01421b1.pdf]

## Electronic supplementary information

### High and Stable Photoelectrochemical Activity of ZnO/ZnSe/CdSe/Cu<sub>x</sub>S Core-Shell Nanowire Arrays: Nanoporous Surface with Cu<sub>x</sub>S as a Hole Mediator

Wei-Xin Ouyang, Yu-Xiang Yu\*, Wei-De Zhang\*

School of Chemistry and Chemical Engineering, South China University of  
Technology, 381 Wushan Road, Guangzhou 510640, People's Republic of China

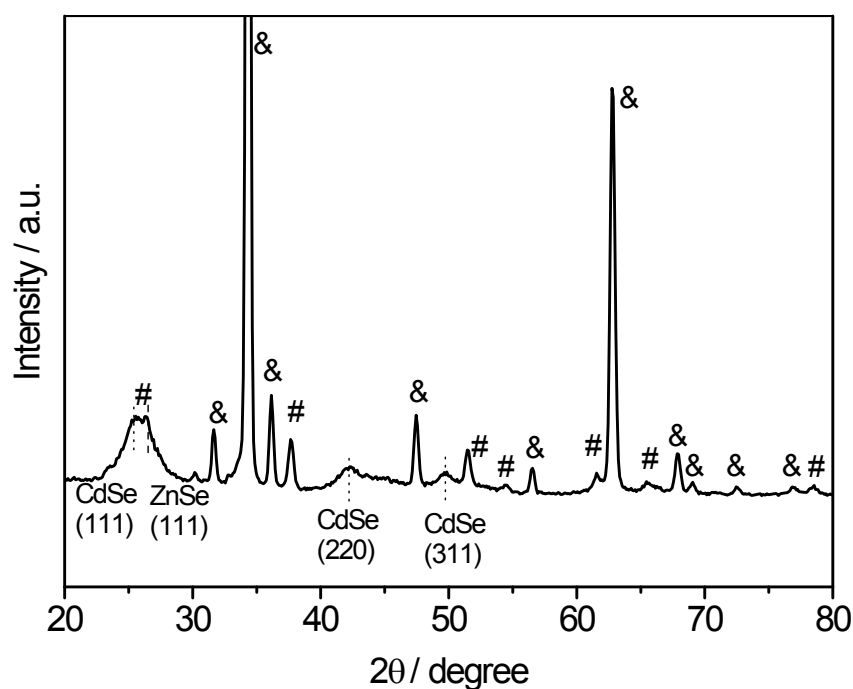

Figure S1. XRD pattern of ZnO/ZnSe/CdSe/Cu<sub>x</sub>S sample. Peaks from FTO and ZnO are indicated by # and &, respectively.

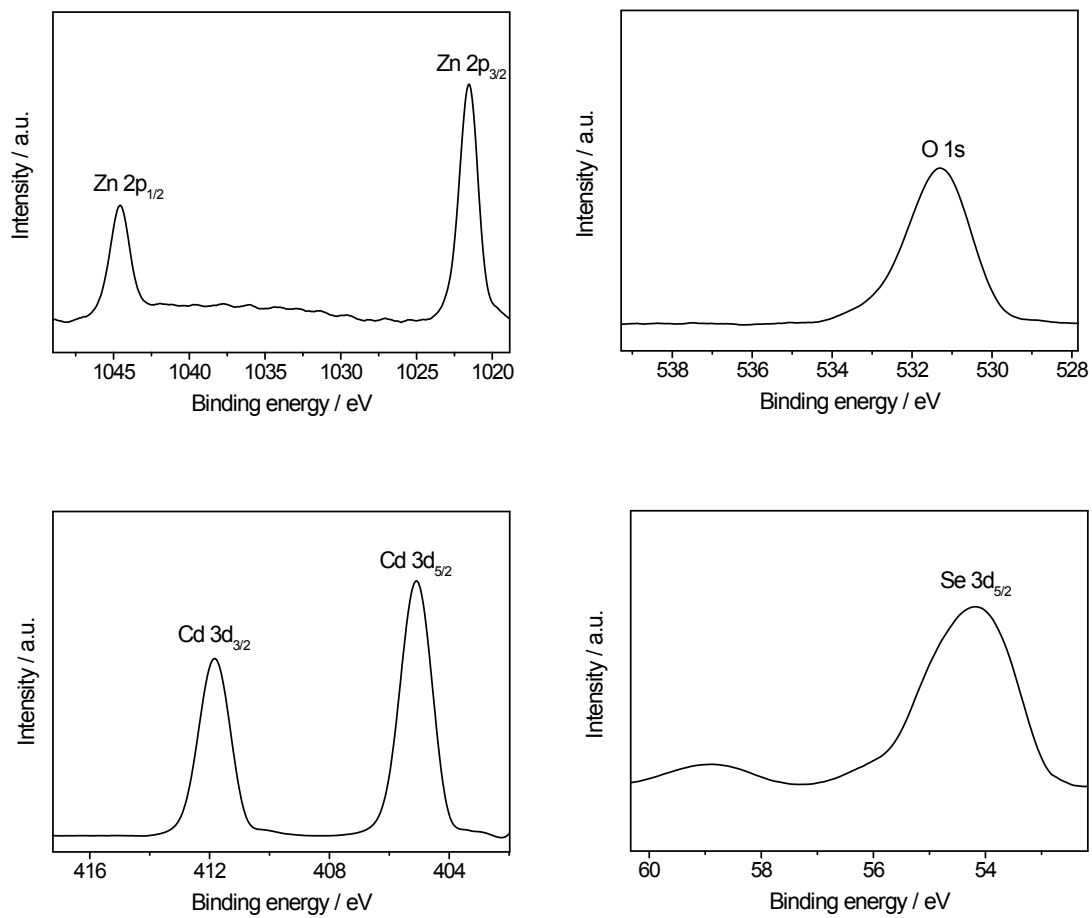

Figure S2. XPS spectra of Zn, O, Cd and Se elements of the ZnO/ZnSe/CdSe/Cu<sub>x</sub>S

Table S1. Photoelectrochemical Performance Using II -VI Group Semiconductor

## Sensitized ZnO Nanowire/Nanorod Array Photoelectrodes

| Electrode Materials                               | Methods <sup>(a)</sup>                   | Light Source | Electrolyte                                                          | Saturated Photocurrent density (mA/cm <sup>2</sup> ) | Maximum IPCE    | Ref.      |
|---------------------------------------------------|------------------------------------------|--------------|----------------------------------------------------------------------|------------------------------------------------------|-----------------|-----------|
| CdSe/ZnO                                          | SILAR                                    | AM 1.5       | 0.5M Na <sub>2</sub> S                                               | 3.5 (0.25V vs Ag/AgCl)                               | 46% at 460 nm   | 1         |
| CdSe/CdS/ZnO                                      | SILAR-CdS<br>CBD-CdSe                    | AM 1.5G      | 1M Na <sub>2</sub> S                                                 | 9.15 (0V vs SCE)                                     | -               | 2         |
| IrO <sub>x</sub> ·nH <sub>2</sub> O/CdSe /CdS/ZnO | SILAR-CdS<br>CBD-CdSe                    | AM 1.5G      | 0.25M Na <sub>2</sub> S,<br>0.35M Na <sub>2</sub> SO <sub>3</sub>    | 13.9 (0.6V vs. RHE)                                  | -               | 3         |
| ZnO/CdTe/CdS                                      | SILAR-CdS<br>ED-CdTe                     | AM 1.5G      | 0.1 M KCl, 0.1 M Na <sub>2</sub> S, 0.3 M S                          | 12.4 (0V vs Ag/AgCl)                                 | -               | 4         |
| ZnO/CdSe                                          | ED-CdSe                                  | AM 1.5G      | 0.2 M Na <sub>2</sub> S                                              | 14.9 (0.86V vs. RHE)                                 | 34% at 410 nm   | 5         |
| ZnSe/CdS/CdSe/<br>ZnO                             | IE-ZnSe<br>CBD-CdS,<br>CdSe              | AM 1.5G      | 0.35 M Na <sub>2</sub> SO <sub>3</sub> ,<br>0.24 M Na <sub>2</sub> S | 5.6 (0.25V vs Ag/AgCl)                               | 35% at 380 nm   | 6         |
| CdSe/CdS/ZnO                                      | SILAR-CdS,<br>CdSe                       | AM 1.5       | 0.5 M Na <sub>2</sub> S                                              | 14.5 (0.25V vs Ag/AgCl)                              | -               | 7         |
| ZnO/ZnSe/CdSe /Cu <sub>x</sub> S                  | IE-ZnSe, CdSe<br>SILAR-Cu <sub>x</sub> S | AM 1.5G      | 0.50 M Na <sub>2</sub> S,<br>0.50 M Na <sub>2</sub> SO <sub>3</sub>  | 16.7 (0.25V vs Ag/AgCl)                              | 89.5% at 500 nm | This work |

(a) SILAR: Successive Ionic Layer Adsorption and Reaction; CBD: Chemical Bath Deposition; ED: Electrochemical Deposition; IE: Ion Exchange;

## References

1. C. J. Lin, S. Y. Chen and Y. H. Liou, *Electrochem. Commun.*, 2010, **12**, 1513-1516.
2. M. Seol, H. Kim, W. Kim and K. Yong, *Electrochem. Commun.*, 2010, **12**, 1416-1418.
3. M. Seol, J. W. Jang, S. Cho, J. S. Lee and K. Yong, *Chem. Mater.*, 2013, **25**, 184-189.
4. R. Liu, X. N. Wang, H. Zhou, T. Wang, J. Q. Zhang, Y. Xu, C. He, B. Y. Wang, J. Zhang and H. Wang, *Int. J. Hydrogen Energ*, 2013, **38**, 16755-16760.
5. J. W. Miao, H. B. Yang, S. Y. Khoo and B. Liu, *Nanoscale*, 2013, **5**, 11118-11124.
6. H. Xu, R. Mo, C. W. Cheng, G. J. Ai, Q. Chen, S. Yang, H. X. Li and J. X. Zhong, *Rsc Adv.*, 2014, **4**, 47429-47435.
7. C. J. Lin, L. C. Kao, Y. Huang, M. A. Banares and S. Y. H. Liou, *Int. J. Hydrogen Energ*, 2015, **40**, 1388-1393.
